# Supplementary material
Source: MDPI journal article supplement (https://www.mdpi.com/2673-4591/6/1/63)
Supplement: s1 [file s1 › engproc-1334442-supplementary.pdf]

# A Washable Silver-Printed Textile Electrode for ECG Monitoring <sup>†</sup>

Abreha Bayrau Nigusse <sup>1,2,\*</sup>, Benny Malengier <sup>1</sup>, Desalegn Alemu Mengistie <sup>2,3</sup> and Lieva Van Langenhove <sup>1</sup>

<sup>1</sup> Department of Materials, Textiles and Chemical Engineering, Ghent University, 9000 Ghent, Belgium; Benny.Malengier@UGent.be (B.M.); Lieva.VanLangenhove@UGent.be (L.V.L.)

<sup>2</sup> Ethiopian Institute of Textile and Fashion Technology, Bahir Dar University, Bahir Dar 6000, Ethiopia; dmengist@calpoly.edu

<sup>3</sup> Materials Engineering, California Polytechnic State University, San Luis Obispo, CA 93401, USA

\* Correspondence: AbehaBayrau.BayrauNigusse@UGent.be; Tel.: +32-465-66-8911

<sup>†</sup> Presented at the 8th International Symposium on Sensor Science, 17–26 May 2021; Available online: <https://i3s2021dresden.sciforum.net/>.

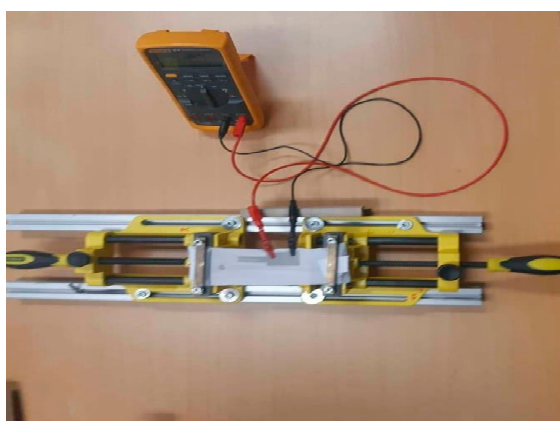

(a)

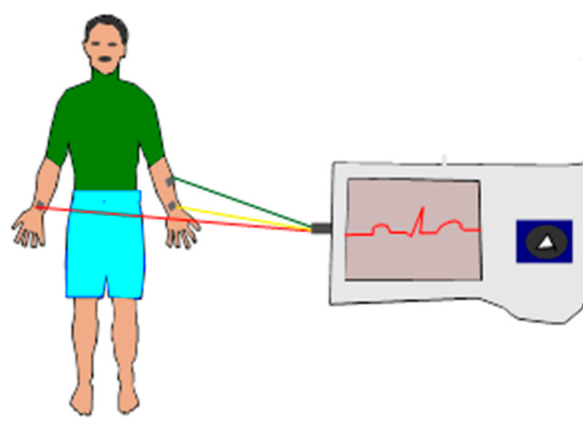

(b)

**Figure S1.** (a) Four-point method sheet resistance measurement setup (b) Block diagram for ECG measurement.

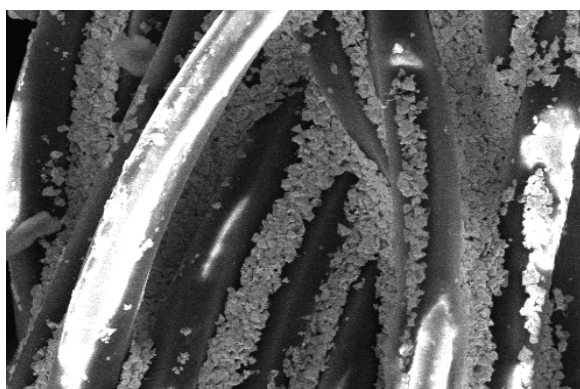

(a)

(b)

**Figure S2.** (a) SEM image of silver printed polyester; and (b) Effect of stretching on surface resistance of printed fabric.

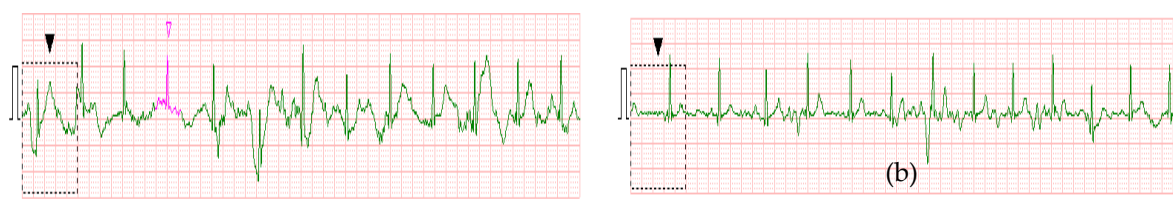

**Figure S3.** Signals collected in walking condition: (a) for printed textile electrode and (b) for Ag/AgCl electrodes.
